# Supplementary material
Source: PubMed Central journal article supplement (PMC10357366)
Supplement: jamapsychiatry-e232392-s002.pdf [file jamapsychiatry-e232392-s002.pdf]

## Data Sharing Statement

Castro-Camacho. Effects of a Contextual Adaptation of the Unified Protocol in Multiple Emotional Disorders in Individuals Exposed to Armed Conflict in Colombia. *JAMA Psychiatry*. Published July 19, 2023. doi:10.1001/jamapsychiatry.2023.2392

### Data

**Data available:** Yes

**Data types:** Deidentified participant data

**How to access data:** [n.garcia1383@uniandes.edu.co](mailto:n.garcia1383@uniandes.edu.co)

**When available:** With publication

### Supporting Documents

**Document types:** None

### Additional Information

**Who can access the data:** Researchers whose proposed use of the data has been approved

**Types of analyses:** For any purpose

**Mechanisms of data availability:** Signed data access agreement
